# Supplementary material for: Influence of self-assembly on intercalative DNA binding interaction of double-chain surfactant Co(iii) complexes containing imidazo[4,5-f][1,10]phenanthroline and dipyrido[3,2-d:2′-3′-f]quinoxaline ligands: experimental and theoretical study
Source: Royal Society of Chemistry journal article supplement (doi:10.1039/c4dt02134g), 2014-01-01
Supplement: c4dt02134g1.pdf [file c4dt02134g1.pdf]

### Supplementary Informations (SI)

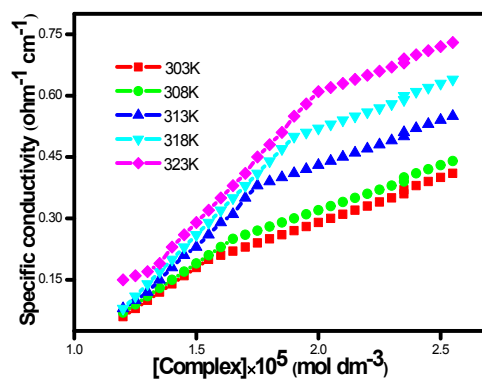

SI Fig. 1. Electrical conductivity vs. complex (2) concentration in aqueous solutions.

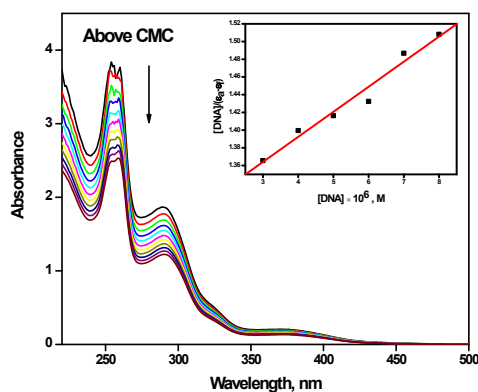

SI Fig. 2. Absorption spectra of complex (2) (Above cmc): in the absence (dotted line) and in the presence (solid lines) of increasing amounts of CT DNA. {Inset: Plot of  $[DNA] / (\epsilon_a - \epsilon_f)$  vs.  $[DNA]$ }.  $[complex] = 1.0 \times 10^{-4} M$ ;  $[DNA] = 0-9.1 \times 10^{-5} M$ .

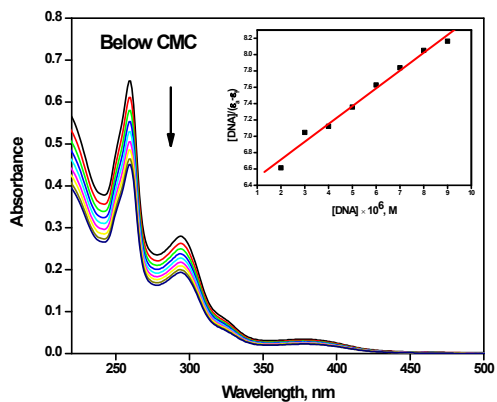

SI Fig. 3. Absorption spectra of complex (2) (Below cmc): in the absence (dotted line) and in the presence (solid lines) of increasing amounts of CT DNA. {Inset: Plot of  $[DNA] / (\epsilon_a - \epsilon_f)$  vs.  $[DNA]$ }.  $[complex] = 1.0 \times 10^{-6} M$ ;  $[DNA] = 0-9.1 \times 10^{-5} M$ .

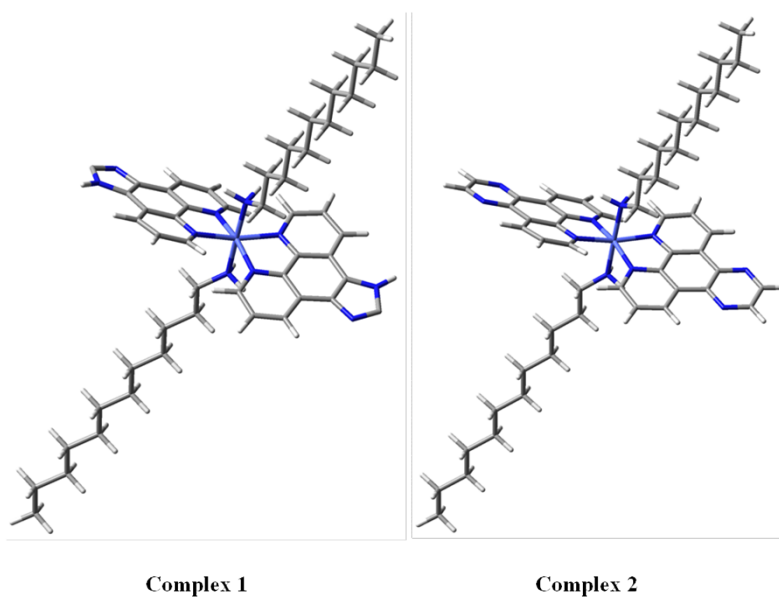

SI Fig. 4. Optimized geometries of surfactant Co(III) complexes (1) and (2).

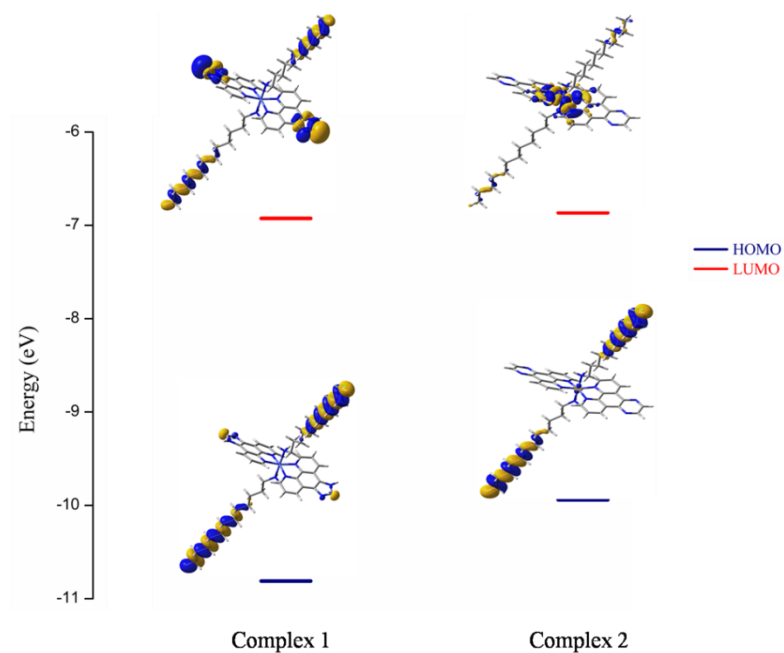

SI Fig. 5. Calculated frontier molecular orbitals of the surfactant Co(III) complexes (1) and (2) at B3LYP/LANL2DZ level.

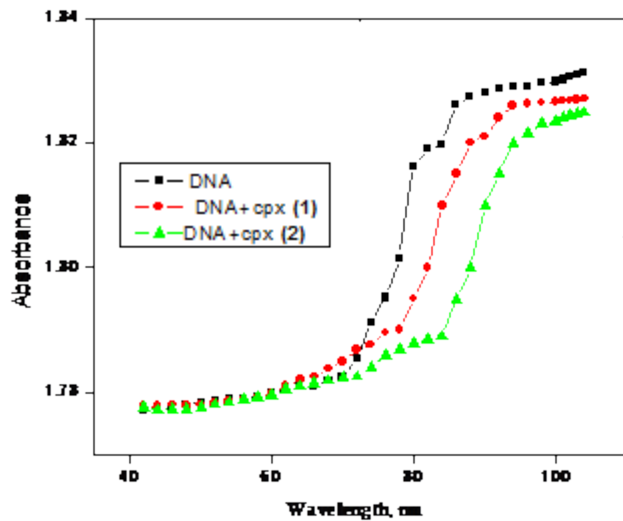

SI Fig. 6. DNA melting curves at 260 nm in the absence and presence of surfactant Co(III) complexes (1) and (2) at 8  $\mu\text{M}$ ; [DNA] 80  $\mu\text{M}$ .

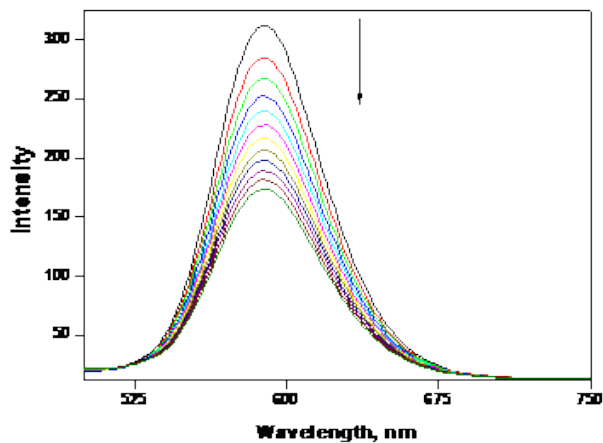

SI Fig. 7. Emission spectra of EB bound to CT DNA: in the absence and in the presence of surfactant Co(III) complex (2).

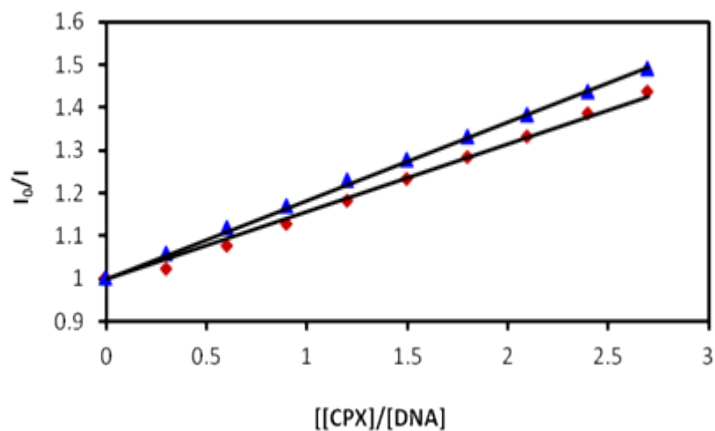

SI Fig. 8: Fluorescence quenching curves of EB bound to DNA by surfactant Co(III) complexes (red),  $[\text{Co}(\text{ip})_2(\text{C}_{12}\text{H}_{25}\text{NH}_2)_2](\text{ClO}_4)_3$  and (blue),  $[\text{Co}(\text{dpq})_2(\text{C}_{12}\text{H}_{25}\text{NH}_2)_2](\text{ClO}_4)_3$ ; Plot of  $[\text{complex}]/[\text{DNA}]$  vs.  $I_0/I$ .  $[\text{DNA}] = 1 \times 10^{-4} \text{ M}$ ;  $[\text{complex}] = 5 \times 10^{-4} \text{ M}$ .

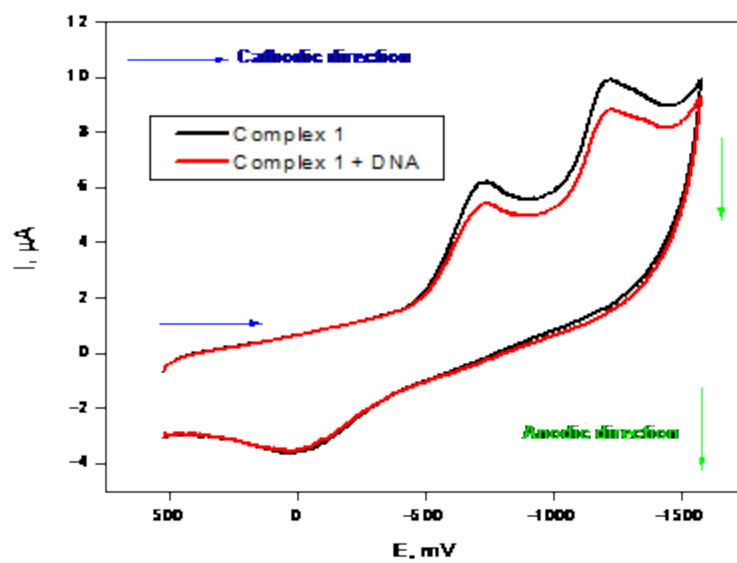

SI Fig. 9. CV spectra of complex (**1**) in the absence (black solid line) and in the presence (red solid line) of CT DNA.  $[\text{Complex}] = 1 \times 10^{-3} \text{ M}$ ;  $[\text{DNA}] = 0 - 2.68 \times 10^{-5} \text{ M}$ .

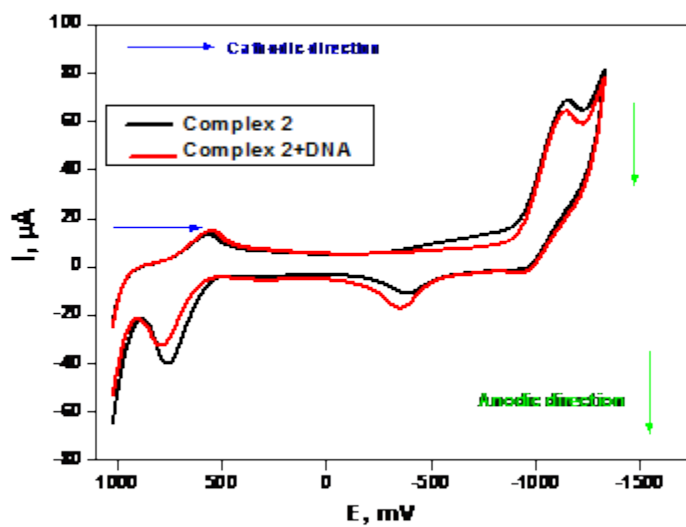

SI Fig. 10. CV spectra of complex (**2**) in the absence (black solid line) and in the presence (red solid line) of CT DNA.  $[\text{Complex}] = 1 \times 10^{-3} \text{ M}$ ;  $[\text{DNA}] = 0 - 2.68 \times 10^{-5} \text{ M}$ .

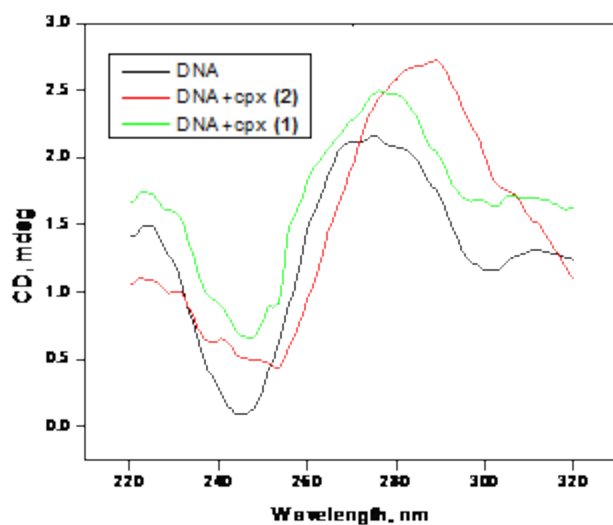

SI Fig. 11. Circular dichroism spectra in the absence (dotted line) and in the presence of surfactant Co(III) complex (1) and (2). [complex] =  $5 \times 10^{-5}$  M; [DNA] =  $1 \times 10^{-4}$  M.

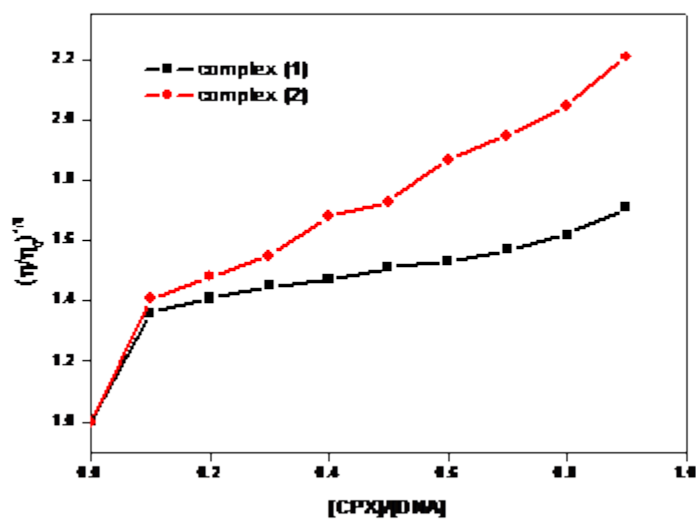

SI Fig. 12. Effects of increasing amounts of surfactant Co(III) complexes in presence of CT DNA on the relative viscosities of calf thymus DNA at  $29.0 (\pm 0.1)^\circ\text{C}$ .

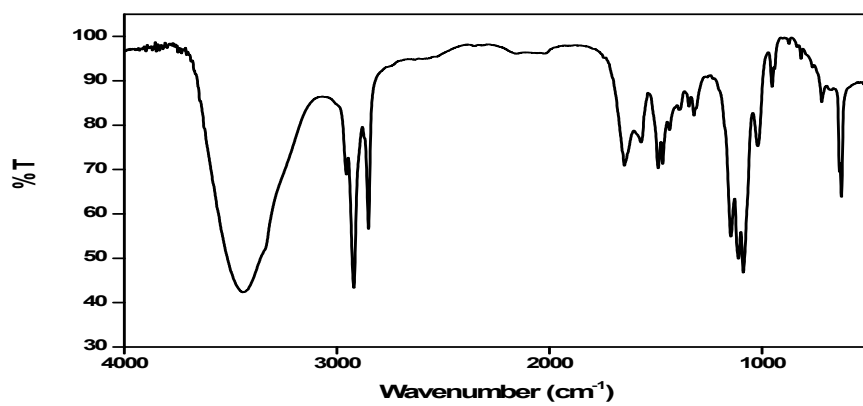

SI Fig. 13. IR spectrum of *cis*-[Co(ip)<sub>2</sub>(DA)<sub>2</sub>](ClO<sub>4</sub>)<sub>3</sub>

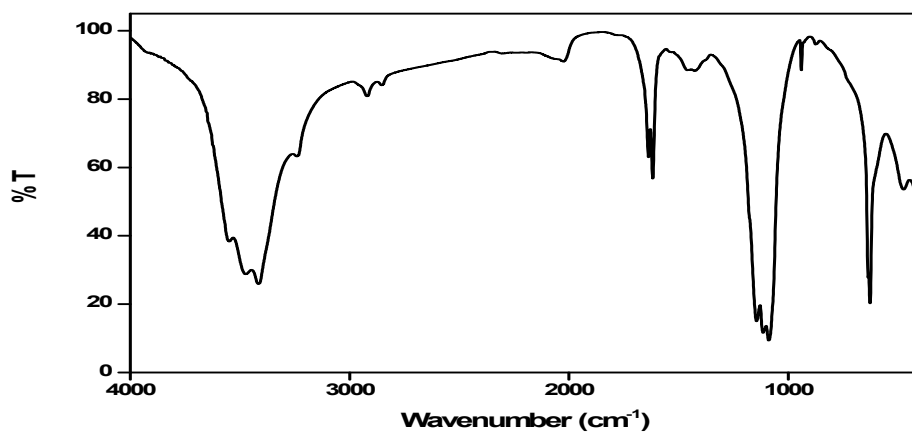

SI Fig. 14. IR spectrum of *cis*-[Co(dpq)<sub>2</sub>(DA)<sub>2</sub>](ClO<sub>4</sub>)<sub>3</sub>

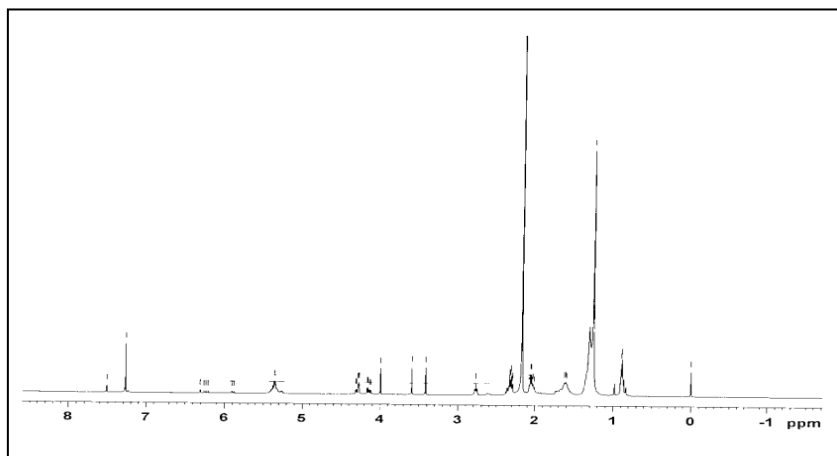

SI Fig. 15.  $^1\text{H}$  NMR spectrum of  $\text{cis-}[\text{Co}(\text{ip})_2(\text{DA})_2](\text{ClO}_4)_3$

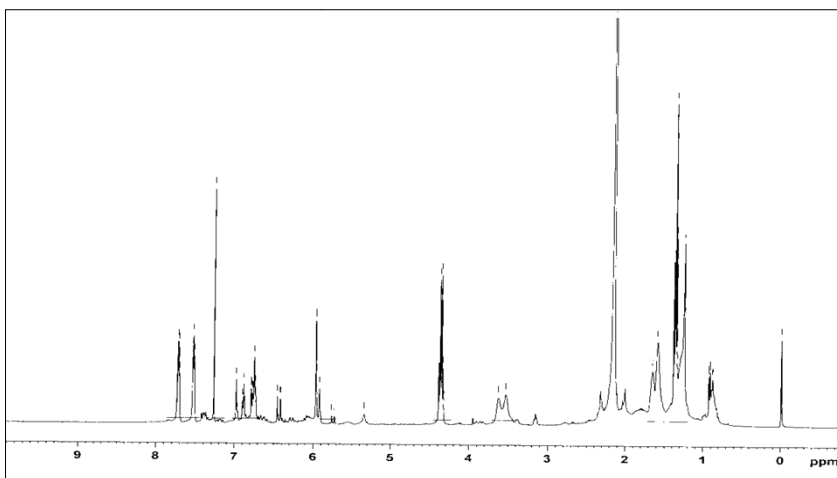

SI Fig. 16.  $^1\text{H}$  NMR spectrum of  $\text{cis-}[\text{Co}(\text{dpq})_2(\text{DA})_2](\text{ClO}_4)_3$



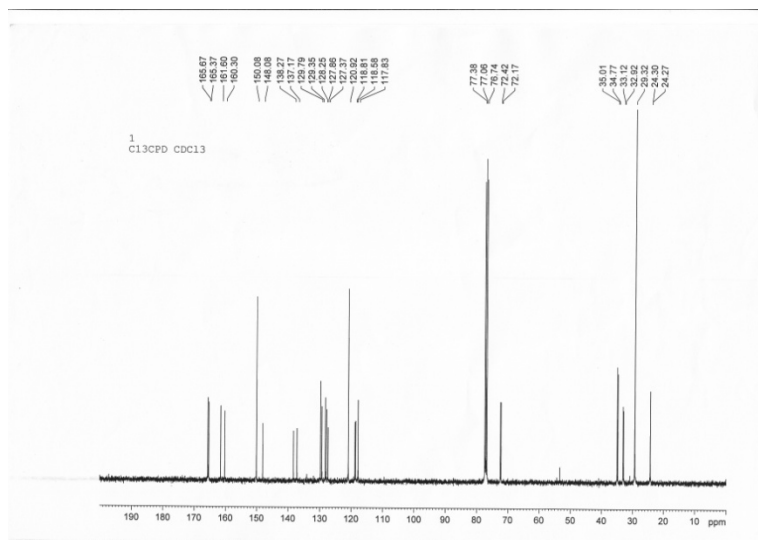

SI Fig. 17.  $^{13}\text{C}$  NMR spectrum of *cis*-[Co(ip) $_2$ (DA) $_2$ ](ClO $_4$ ) $_3$

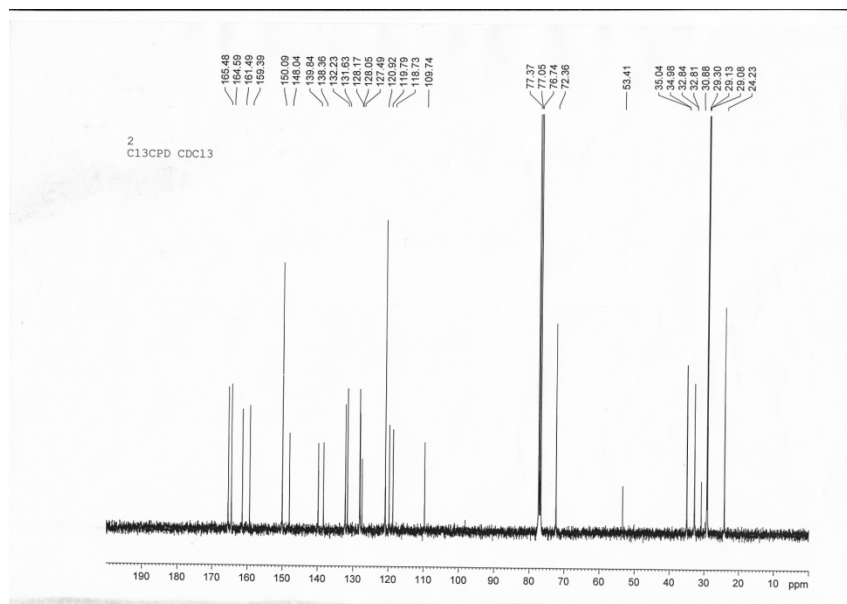

SI Fig. 18.  $^{13}\text{C}$  NMR spectrum of *cis*-[Co(dpq) $_2$ (DA) $_2$ ](ClO $_4$ ) $_3$

## SI Tables

SI Table 1. CMC values of the surfactant Co(III) complex (**2**) in aqueous solution.

| Temperature | CMC $\times 10^5$ | $-\Delta G_{\text{mic}}^0$ (kJ mol <sup>-1</sup> ) | $-\Delta H_{\text{mic}}^0$ (kJ mol <sup>-1</sup> ) | $T\Delta S_{\text{mic}}^0$ (kJ mol <sup>-1</sup> ) |
|-------------|-------------------|----------------------------------------------------|----------------------------------------------------|----------------------------------------------------|
| 303K        | 1.55              | -28.36                                             | -11.76                                             | 16.60                                              |
| 308K        | 1.65              | -30.63                                             | -12.34                                             | 18.29                                              |
| 313K        | 1.75              | -31.44                                             | -17.51                                             | 13.93                                              |
| 318K        | 1.91              | -35.56                                             | -19.36                                             | 16.20                                              |
| 323K        | 2.07              | -38.39                                             | -27.76                                             | 10.63                                              |
